# Supplementary material for: Genotype Shift of Malaysian Porcine Circovirus 2 (PCV2) from PCV2b to PCV2d within a Decade
Source: MDPI journal article supplement (doi:10.3390/ani12141849), 2022-07-21
Supplement: s1 [file s1]

**Supplementary Table S3. Selection pressures acting on codons of PCV2 *cap* gene nucleotide sequences.** Each codon under statistically significant positive and negative selective pressure were listed with their respective statistical details. Selection pressure inferring methods applied were FUBAR, FEL and SLAC for both positive and negative selection; with an additional method MEME for positive pressure. Statistical significance were set at  $pp > 0.9$  for FUBAR and  $p < 0.05$  for FEL, SLAC and MEME.

| Positive Selection |          |         |                                                |          |         |                                     |       |    |                        |      |                  |          |         |                                                |          |         |                                     |      |    |                        |       |                  |          |         |                                                |          |         |                                     |      |    |                        |      |                  |  |  |
|--------------------|----------|---------|------------------------------------------------|----------|---------|-------------------------------------|-------|----|------------------------|------|------------------|----------|---------|------------------------------------------------|----------|---------|-------------------------------------|------|----|------------------------|-------|------------------|----------|---------|------------------------------------------------|----------|---------|-------------------------------------|------|----|------------------------|------|------------------|--|--|
| PCV2<br>Genotype   | PCV2a    |         |                                                |          |         |                                     |       |    |                        |      | PCV2b            |          |         |                                                |          |         |                                     |      |    |                        | PCV2d |                  |          |         |                                                |          |         |                                     |      |    |                        |      |                  |  |  |
|                    | FUBAR    |         |                                                | FEL      |         |                                     | SLAC  |    |                        | MEME |                  | FUBAR    |         |                                                | FEL      |         |                                     | SLAC |    |                        | MEME  |                  | FUBAR    |         |                                                | FEL      |         |                                     | SLAC |    |                        | MEME |                  |  |  |
|                    | $\alpha$ | $\beta$ | $\frac{\alpha < \beta, \text{ at pp} > 0.9}{}$ | $\alpha$ | $\beta$ | $\frac{\beta > \alpha, p < 0.05}{}$ | dS    | dN | dN/dS > 1, at p < 0.05 | p+   | p+ > 0, p < 0.05 | $\alpha$ | $\beta$ | $\frac{\alpha < \beta, \text{ at pp} > 0.9}{}$ | $\alpha$ | $\beta$ | $\frac{\beta > \alpha, p < 0.05}{}$ | dS   | dN | dN/dS > 1, at p < 0.05 | p+    | p+ > 0, p < 0.05 | $\alpha$ | $\beta$ | $\frac{\alpha < \beta, \text{ at pp} > 0.9}{}$ | $\alpha$ | $\beta$ | $\frac{\beta > \alpha, p < 0.05}{}$ | dS   | dN | dN/dS > 1, at p < 0.05 | p+   | p+ > 0, p < 0.05 |  |  |
| 8                  |          |         |                                                |          |         |                                     |       |    |                        |      |                  |          |         |                                                |          |         |                                     |      |    |                        |       |                  |          |         |                                                |          |         |                                     |      |    |                        |      |                  |  |  |
| 12                 |          |         |                                                |          |         |                                     |       |    |                        |      |                  |          |         |                                                |          |         |                                     |      |    |                        |       |                  |          |         |                                                |          |         |                                     |      |    |                        |      |                  |  |  |
| 17                 |          |         |                                                |          |         |                                     |       |    |                        |      |                  |          |         |                                                |          |         |                                     |      |    |                        |       |                  |          |         |                                                |          |         |                                     |      |    |                        |      |                  |  |  |
| 57                 |          |         |                                                |          |         |                                     |       |    |                        |      |                  |          |         |                                                |          |         |                                     |      |    |                        |       |                  |          |         |                                                |          |         |                                     |      |    |                        |      |                  |  |  |
| 59                 |          |         |                                                |          |         |                                     |       |    |                        |      |                  |          |         |                                                |          |         |                                     |      |    |                        |       |                  |          |         |                                                |          |         |                                     |      |    |                        |      |                  |  |  |
| 63                 |          | 0.888   | 6.846                                          | 0.969    |         |                                     |       |    |                        |      |                  |          |         |                                                |          |         |                                     |      |    |                        |       |                  |          |         |                                                |          |         |                                     |      |    |                        |      |                  |  |  |
| 68                 |          |         |                                                |          |         |                                     |       |    |                        |      |                  |          |         |                                                |          |         |                                     |      |    |                        |       |                  |          |         |                                                |          |         |                                     |      |    |                        |      |                  |  |  |
| 86                 |          |         |                                                |          |         |                                     |       |    |                        |      |                  |          |         |                                                |          |         |                                     |      |    |                        |       |                  |          |         |                                                |          |         |                                     |      |    |                        |      |                  |  |  |
| 89                 |          |         |                                                |          |         |                                     |       |    |                        |      |                  |          |         |                                                |          |         |                                     |      |    |                        |       |                  |          |         |                                                |          |         |                                     |      |    |                        |      |                  |  |  |
| 130                |          |         |                                                |          |         |                                     |       |    |                        |      |                  |          |         |                                                |          |         |                                     |      |    |                        |       |                  |          |         |                                                |          |         |                                     |      |    |                        |      |                  |  |  |
| 131                |          |         |                                                |          |         |                                     |       |    |                        |      |                  |          |         |                                                |          |         |                                     |      |    |                        |       |                  |          |         |                                                |          |         |                                     |      |    |                        |      |                  |  |  |
| 169                |          |         |                                                |          |         |                                     |       |    |                        |      |                  |          |         |                                                |          |         |                                     |      |    |                        |       |                  |          |         |                                                |          |         |                                     |      |    |                        |      |                  |  |  |
| 190                |          |         |                                                |          |         |                                     |       |    |                        |      |                  |          |         |                                                |          |         |                                     |      |    |                        |       |                  |          |         |                                                |          |         |                                     |      |    |                        |      |                  |  |  |
| 191                |          | 0.683   | 6.657                                          | 0.987    | 0       | 3.113                               | 0.029 |    |                        |      |                  |          |         |                                                |          |         |                                     |      |    |                        |       |                  |          |         |                                                |          |         |                                     |      |    |                        |      |                  |  |  |
| 231                |          |         |                                                |          |         |                                     |       |    |                        |      |                  |          |         |                                                |          |         |                                     |      |    |                        |       |                  |          |         |                                                |          |         |                                     |      |    |                        |      |                  |  |  |
| 232                |          | 1.216   | 5.183                                          | 0.911    |         |                                     |       |    |                        |      |                  |          |         |                                                |          |         |                                     |      |    |                        |       |                  |          |         |                                                |          |         |                                     |      |    |                        |      |                  |  |  |

| Negative Selection |          |         |                                                |          |         |                                     |      |       |                        |      |                  |          |         |                                                |          |         |                                     |       |    |                        |       |                  |          |         |                                                |          |         |                                     |       |       |                        |      |                  |          |   |          |
|--------------------|----------|---------|------------------------------------------------|----------|---------|-------------------------------------|------|-------|------------------------|------|------------------|----------|---------|------------------------------------------------|----------|---------|-------------------------------------|-------|----|------------------------|-------|------------------|----------|---------|------------------------------------------------|----------|---------|-------------------------------------|-------|-------|------------------------|------|------------------|----------|---|----------|
| PCV2<br>Genotype   | PCV2a    |         |                                                |          |         |                                     |      |       |                        |      | PCV2b            |          |         |                                                |          |         |                                     |       |    |                        | PCV2d |                  |          |         |                                                |          |         |                                     |       |       |                        |      |                  |          |   |          |
|                    | FUBAR    |         |                                                | FEL      |         |                                     | SLAC |       |                        | MEME |                  | FUBAR    |         |                                                | FEL      |         |                                     | SLAC  |    |                        | MEME  |                  | FUBAR    |         |                                                | FEL      |         |                                     | SLAC  |       |                        | MEME |                  |          |   |          |
|                    | $\alpha$ | $\beta$ | $\frac{\alpha < \beta, \text{ at pp} > 0.9}{}$ | $\alpha$ | $\beta$ | $\frac{\beta > \alpha, p < 0.05}{}$ | dS   | dN    | dN/dS > 1, at p < 0.05 | p+   | p+ > 0, p < 0.05 | $\alpha$ | $\beta$ | $\frac{\alpha < \beta, \text{ at pp} > 0.9}{}$ | $\alpha$ | $\beta$ | $\frac{\beta > \alpha, p < 0.05}{}$ | dS    | dN | dN/dS > 1, at p < 0.05 | p+    | p+ > 0, p < 0.05 | $\alpha$ | $\beta$ | $\frac{\alpha < \beta, \text{ at pp} > 0.9}{}$ | $\alpha$ | $\beta$ | $\frac{\beta > \alpha, p < 0.05}{}$ | dS    | dN    | dN/dS > 1, at p < 0.05 | p+   | p+ > 0, p < 0.05 |          |   |          |
| 9                  | 6.54     | 0.323   | 0.991                                          | 3.775    | 0       | 0.0058                              | 2.76 | 0     | 0.048259               |      |                  | 11.923   | 0.478   | 0.999                                          | 3.763    | 0       | 0.0065                              | 3.31  | 0  | 0.026582               |       |                  |          |         |                                                |          |         |                                     |       |       |                        |      |                  |          |   |          |
| 10                 |          |         |                                                |          |         |                                     |      |       |                        |      |                  |          |         |                                                |          |         |                                     |       |    |                        |       |                  |          |         |                                                |          |         |                                     |       |       |                        |      |                  |          |   |          |
| 11                 | 10.355   | 0.772   | 0.995                                          | 5.334    | 0.534   | 0.0109                              | 4.93 | 0.645 | 0.031497               |      |                  |          |         |                                                |          |         |                                     |       |    |                        |       |                  |          |         |                                                |          |         |                                     |       |       |                        |      |                  |          |   |          |
| 15                 |          |         |                                                |          |         |                                     |      |       |                        |      |                  |          |         |                                                |          |         |                                     |       |    |                        |       |                  |          |         |                                                |          |         |                                     |       |       |                        |      |                  |          |   |          |
| 16                 |          |         |                                                |          |         |                                     |      |       |                        |      |                  |          |         |                                                |          |         |                                     |       |    |                        |       |                  |          |         |                                                |          |         |                                     |       |       |                        |      |                  |          |   |          |
| 21                 | 8.837    | 0.664   | 0.951                                          | 5.03     | 0.399   | 0.0378                              |      |       |                        |      |                  |          |         |                                                |          |         |                                     |       |    |                        |       |                  |          |         |                                                |          |         |                                     |       |       |                        |      |                  |          |   |          |
| 35                 | 4.238    | 0.32    | 0.957                                          | 2.81     | 0       | 0.0166                              |      |       |                        |      |                  |          |         |                                                |          |         |                                     |       |    |                        |       |                  |          |         |                                                |          |         |                                     |       |       |                        |      |                  |          |   |          |
| 37                 | 4.325    | 0.321   | 0.957                                          | 2.81     | 0       | 0.0174                              |      |       |                        |      |                  | 31.306   | 0.502   | 1                                              | 13.486   | 0       | 0                                   | 4.96  | 0  | 0.004302               |       |                  |          |         |                                                |          |         |                                     |       |       |                        |      |                  |          |   |          |
| 40                 |          |         |                                                |          |         |                                     |      |       |                        |      |                  |          |         |                                                |          |         |                                     |       |    |                        |       |                  |          |         |                                                |          |         |                                     |       |       |                        |      |                  |          |   |          |
| 43                 |          |         |                                                |          |         |                                     |      |       |                        |      |                  |          |         |                                                | 2.605    | 0       | 0.0444                              |       |    |                        |       |                  |          |         |                                                |          |         | 5.24                                | 0.286 | 0.991 | 3                      | 0    | 0.0026           | 3.43785  | 0 | 0.024851 |
| 49                 |          |         |                                                |          |         |                                     |      |       |                        |      |                  |          |         |                                                | 7.721    | 0       | 0.0061                              | 2.9   | 0  | 0.040893               |       |                  |          |         |                                                |          |         | 1.883                               | 0     | 0.044 |                        |      |                  |          |   |          |
| 54                 |          |         |                                                |          |         |                                     |      |       |                        |      |                  | 17.479   | 0.543   | 0.998                                          |          |         |                                     |       |    |                        |       |                  |          |         |                                                |          |         | 4.07                                | 0.288 | 0.967 | 2.81                   | 0    | 0.0077           |          |   |          |
| 62                 |          |         |                                                |          |         |                                     |      |       |                        |      |                  |          |         |                                                | 11.696   | 0.471   | 0.985                               | 5.357 | 0  | 0.0084                 |       |                  |          |         |                                                |          |         | 5.207                               | 0.328 | 0.97  | 3.629                  | 0    | 0.008            |          |   |          |
| 64                 |          |         |                                                |          |         |                                     |      |       |                        |      |                  |          |         |                                                | 5.487    | 0.474   | 0.946                               |       |    |                        |       |                  |          |         |                                                |          |         | 2.136                               | 0.352 | 0.909 |                        |      |                  |          |   |          |
| 68                 |          |         |                                                |          |         |                                     |      |       |                        |      |                  |          |         |                                                | 5.462    | 0.447   | 0.951                               |       |    |                        |       |                  |          |         |                                                |          |         |                                     |       |       |                        |      |                  |          |   |          |
| 69                 |          |         |                                                |          |         |                                     |      |       |                        |      |                  |          |         |                                                |          |         |                                     |       |    |                        |       |                  |          |         |                                                |          |         |                                     |       |       |                        |      |                  |          |   |          |
| 70                 |          |         |                                                |          |         |                                     |      |       |                        |      |                  | 9.069    | 0.437   | 0.922                                          | 7.204    | 0       | 0.0168                              |       |    |                        |       |                  |          |         |                                                |          |         | 2.119                               | 0.325 | 0.919 | 1.353                  | 0    | 0.0431           |          |   |          |
| 74                 |          |         |                                                |          |         |                                     |      |       |                        |      |                  | 7.821    | 0.491   | 0.902                                          | 6.046    | 0       | 0.038                               |       |    |                        |       |                  |          |         |                                                |          |         |                                     |       |       |                        |      |                  |          |   |          |
| 78                 |          |         |                                                |          |         |                                     |      |       |                        |      |                  |          |         |                                                |          |         |                                     |       |    |                        |       |                  |          |         |                                                |          |         |                                     |       |       |                        |      |                  |          |   |          |
| 79                 |          |         |                                                |          |         |                                     |      |       |                        |      |                  |          |         |                                                |          |         |                                     |       |    |                        |       |                  |          |         |                                                |          |         | 3.907                               | 0.296 | 0.922 | 4.865                  | 0    | 0.0157           |          |   |          |
| 85                 |          |         |                                                |          |         |                                     |      |       |                        |      |                  |          |         |                                                |          |         |                                     |       |    |                        |       |                  |          |         |                                                |          |         |                                     |       |       |                        |      |                  |          |   |          |
| 91                 |          |         |                                                |          |         |                                     |      |       |                        |      |                  |          |         |                                                |          |         |                                     |       |    |                        |       |                  |          |         |                                                |          |         |                                     |       |       |                        |      |                  |          |   |          |
| 99                 |          |         |                                                |          |         |                                     |      |       |                        |      |                  | 5.441    | 0.454   | 0.949                                          |          |         |                                     |       |    |                        |       |                  |          |         |                                                |          |         |                                     |       |       |                        |      |                  |          |   |          |
| 100                |          |         |                                                |          |         |                                     |      |       |                        |      |                  |          |         |                                                |          |         |                                     |       |    |                        |       |                  |          |         |                                                |          |         | 5.093                               | 0.316 | 0.994 | 2.518                  | 0    | 0.005            | 4        | 0 | 0.012346 |
| 103                |          |         |                                                |          |         |                                     |      |       |                        |      |                  |          |         |                                                |          |         |                                     |       |    |                        |       |                  |          |         |                                                |          |         | 5.45                                | 0.288 | 0.991 | 3.157                  | 0    | 0.0024           | 3.466643 | 0 | 0.024676 |
| 105                |          |         |                                                |          |         |                                     |      |       |                        |      |                  |          |         |                                                |          |         |                                     |       |    |                        |       |                  |          |         |                                                |          |         | 8.293                               | 0.316 | 0.996 | 4.755                  | 0    | 0.0012           | 5.237771 | 0 | 0.008633 |
| 108                | 4.079    | 0.338   | 0.951                                          | 2.81     | 0       | 0.0208                              |      |       |                        |      |                  |          |         |                                                |          |         |                                     |       |    |                        |       |                  |          |         |                                                |          |         | 3.397                               | 0.323 | 0.959 | 2.81                   | 0    | 0.0133           |          |   |          |
| 110                | 4.811    | 0.34    | 0.909                                          | 5.454    | 0       | 0.025                               |      |       |                        |      |                  | 9.081    | 0.492   | 0.912                                          | 7.171    | 0       | 0.0321                              |       |    |                        |       |                  |          |         |                                                |          |         |                                     |       |       |                        |      |                  |          |   |          |
| 113                | 5.77     | 0.315   | 0.988                                          | 3        | 0       | 0.0104                              | 3    | 0     | 0.037037               |      |                  | 9.949    | 0.499   | 0.993                                          | 3.061    | 0       | 0.0389                              | 3     | 0  | 0.037037               |       |                  |          |         |                                                |          |         |                                     |       |       |                        |      |                  |          |   |          |
| 115                |          |         |                                                |          |         |                                     |      |       |                        |      |                  |          |         |                                                |          |         |                                     |       |    |                        |       |                  |          |         |                                                |          |         |                                     |       |       |                        |      |                  |          |   |          |
| 118                | 25.558   | 0.361   | 1                                              | 20.205   | 0       | 0                                   | 8.35 | 0     | 0.00172                |      |                  |          |         |                                                |          |         |                                     |       |    |                        |       |                  |          |         |                                                |          |         |                                     |       |       |                        |      |                  |          |   |          |
| 119                | 8.99     | 1.557   | 0.917                                          |          |         |                                     |      |       |                        |      |                  |          |         |                                                |          |         |                                     |       |    |                        |       |                  |          |         |                                                |          |         |                                     |       |       |                        |      |                  |          |   |          |
| 125                | 3.79     | 0.32    | 0.95                                           | 2.389    | 0       | 0.0212                              |      |       |                        |      |                  |          |         |                                                |          |         |                                     |       |    |                        |       |                  |          |         |                                                |          |         |                                     |       |       |                        |      |                  |          |   |          |
| 127                | 7.284    | 0.311   | 0.981                                          | 6.701    | 0       | 0.0027                              | 4.34 | 0     | 0.023551               |      |                  | 5.898    | 0.536   | 0.943                                          |          |         |                                     |       |    |                        |       |                  |          |         |                                                |          |         |                                     |       |       |                        |      |                  |          |   |          |

[illegible]
